# Supplementary material for: Nephrotic-syndrome-associated mutation of KANK2 induces pathologic binding competition with physiological interactor KIF21A
Source: PubMed Central journal article supplement — J Biol Chem. 2021 Jul 16;297(2):100958. doi: 10.1016/j.jbc.2021.100958 (PMC8368038; doi:10.1016/j.jbc.2021.100958), 2021-07-16
Supplement: mmc1.pdf [file mmc1.pdf]

## Supplementary Materials

**Supplementary Table 1. Database references for KANK1-KANK4 family members.**

|                        | Uniprot entry | Isoform | NCBI entry   | Residues number of ANKRDs | SF mutation site | Remark                    |
|------------------------|---------------|---------|--------------|---------------------------|------------------|---------------------------|
| mKANK1                 | E9Q238        | 1       | NP_852069    | 1088-1338                 | 1179             | KANK1 in this study       |
| hKANK1                 | Q14678        | L       | NP_001243805 | 1080-1330                 | 1171             |                           |
| mKANK2                 | Q8BX02        | 1       | NP_663586    | 577-827                   | 668              | KANK2 in this study       |
| hKANK2 <sup>iso1</sup> | Q63ZY3        | 1       | NP_001129663 | 585-835                   | 676              |                           |
| hKANK2 <sup>iso2</sup> | Q63ZY3        | 2       | NP_056308    | 593-843                   | 684              | human KANK2 in this study |
| mKANK3                 | Q9Z1P7        | 1       | NP_109622    | 526-776                   | 689              |                           |
| hKANK3                 | Q6NY19        | 2       | NP_940873    | 543-792                   | 632              |                           |
| mKANK4                 | Q6P9J5        | 1       | NP_766460    | 757-1008                  | 848              |                           |
| hKANK4                 | Q5T7N3        | 1       | NP_859063    | 742-993                   | 833              |                           |

**Supplementary Figure 1. Multiple sequence alignment of the ANKRDs from the KANK family members.** “m” and “h” represent the species mouse and human, respectively. hKANK2<sup>iso1</sup> and hKANK2<sup>iso2</sup> can be accessed under the NCBI accession number NP\_001129663 and NP\_056308, respectively. The SF mutation site was indicated by a green box.

**Supplementary Figure 2. eIF4A1 binds to SF mutants but not the wild-type proteins of KANK1 and KANK2.**

Analysis of complex formation by gel filtration chromatography using 50  $\mu$ M Trx-eIF4A1 mixed with 50  $\mu$ M Trx-KANK1\_ANKRD<sup>WT</sup> (A), Trx-KANK2\_ANKRD<sup>WT</sup> (B) and Trx-KANK2\_ANKRD<sup>SF</sup> (C).

**Supplementary Figure 3. ITC analysis of the interaction between KANK2\_ANKRD and KIF21A.**

**Supplementary Figure 4. Structural comparison of KANK1\_ANKRD in the apo and eIF4A1-bound forms.**

The apo form structure of KANK1\_ANKRD<sup>WT</sup> (PDB code: 5YAZ) is overlapped with the eIF4A1-bound structure of KANK1\_ANKRD<sup>SF</sup> with a RMSD of 0.5 Å.

**Supplementary Figure 5. Crystallographic analysis of the KANK1\_ANKRDSF-eIF4A1\_NAD complex.**

(A and B) The Fo-Fc omit map of the interface residues at site-I (A) and site-II (B). The map is contoured at  $3\sigma$ . (C) The B-factor putty view of the complex structure. The regions involved in site-I and II binding were indicated as dashed circles.

**Supplementary Figure 6. Binding analysis of eIF4A1<sup>M149A</sup> to KANK1\_ANKRD<sup>SF</sup>.** Analytical gel filtration analysis showed no binding of eIF4A1<sup>M149A</sup> to KANK1\_ANKRD<sup>SF</sup>. The M149A mutant of eIF4A1 eluted at the same position as the wild-type protein.

**Supplementary Figure 7. Structural analysis of binding partners of eIF4A1.** Structures of the eIF4A1/eIF4G (PDB code: 2VSO) (A) and eIF4A1/PDCD4 (PDB code: 2ZU6) (B) complexes are used for structural comparison. When one of the eIF4A1 molecule (molecule 1) was aligned to KANK1\_ANKRD<sup>SF</sup>-eIF4A1, the other eIF4A1 molecule (molecule 2) was clashed with ANKRD. Details of the potential clash between ANKRD<sup>SF</sup> and the second molecule of eIF4A1 was shown as an enlarged view.

**Supplementary Figure 8. Surface analysis of eIF4A1-binding sites for different binding partners.**

Crystal structure of eIF4A1 (PDB code: 5ZC9) was shown in surface representation. NTD and CTD of eIF4A1 were shown in wheat and white, respectively. Binding sites for KANK1<sup>SF</sup>, RNA and ATP<sup>1</sup> were colored in yellow, cyan and magenta, respectively.

**Supplementary Figure 9. eIF4A1 and ankyrin-G compete with KIF21A for their binding to KANK1\_ANKRD<sup>SF</sup>.**

The competition assay was using GST-tagged KANK1\_ANKRD<sup>SF</sup> to pulldown eIF4A1 in presence of increasing amounts of the ANKRD-binding peptide of KIF21A. GST-tagged KANK1\_ANKRD<sup>WT</sup> was used as a control.

**Supplementary Figure 10. Binding analysis of KIF21A or eIF4A1 to KANK2\_ANKRD and its mutants.**

Analytical gel filtration analysis showed that KIF21A binds to KANK2\_ANKRD<sup>WT</sup> (A) and KANK2\_ANKRD<sup>SF</sup> (B) but not KANK2\_ANKRD<sup>DA</sup> (C) or KANK2\_ANKRD<sup>SFDA</sup> (D) mutants. In gel filtration column, eIF4A1 was unable to interact with KANK2\_ANKRD<sup>DA</sup> (E) while form a complex with KANK2\_ANKRD<sup>SFDA</sup> (F).

**Supplementary Figure 11. Binding analysis of ARHGDI1 to KANK2\_ANKRD.**

Analytical gel filtration analysis showed no binding of ARHGDI1 to KANK2\_ANKRD<sup>WT</sup> or KANK2\_ANKRD<sup>SF</sup>.

## Supplementary Figures

|            |      |   |   |   |   |   |   |   |   |   |   |   |   |   |   |   |   |   |   |   |   |   |   |   |   |   |   |   |   |   |   |   |   |   |   |   |   |   |   |   |   |   |   |   |   |   |   |   |   |   |   |   |   |   |   |   |   |   |   |   |   |
|------------|------|---|---|---|---|---|---|---|---|---|---|---|---|---|---|---|---|---|---|---|---|---|---|---|---|---|---|---|---|---|---|---|---|---|---|---|---|---|---|---|---|---|---|---|---|---|---|---|---|---|---|---|---|---|---|---|---|---|---|---|---|
| mKANK1     | 1088 | R | E | R | Y | E | L | S | E | K | M | L | S | A | C | N | L | K | Y | N | T | K | D | P | K | A | L | A | S | K | D | M | R | I | C | L | N | T | L | Q | H | D | W | F | R | V | S | S | Q | K | S | A | V | P | A | M | V | G | D | Y |   |
| hKANK1     | 1080 | R | E | R | Y | E | L | S | E | K | M | L | S | A | C | N | L | K | N | T | I | N | D | P | K | A | L | T | S | K | D | M | R | F | C | L | N | T | L | Q | H | E | W | F | R | V | S | S | Q | K | S | A | I | P | A | M | V | G | D | Y |   |
| hKANK2iso1 | 585  | E | I | R | M | E | L | S | P | D | L | I | S | A | C | L | A | L | E | K | Y | L | D | N | P | N | A | L | T | E | R | E | L | K | V | A | Y | T | T | V | L | Q | E | W | L | R | L | A | C | R | S | D | A | H | P | E | L | V | R | R | H |
| hKANK2iso2 | 593  | E | I | R | M | E | L | S | P | D | L | I | S | A | C | L | A | L | E | K | Y | L | D | N | P | N | A | L | T | E | R | E | L | K | V | A | Y | T | T | V | L | Q | E | W | L | R | L | A | C | R | S | D | A | H | P | E | L | V | R | R | H |
| mKANK2     | 577  | E | I | R | M | D | L | S | P | D | L | I | S | A | C | L | A | L | E | K | Y | L | E | N | P | N | A | L | T | E | R | E | L | K | V | A | Y | T | T | V | L | Q | E | W | L | R | L | A | C | R | S | D | A | H | P | E | L | V | R | R | H |
| mKANK4     | 757  | A | E | R | Y | K | P | S | E | E | F | L | N | A | C | R | A | L | S | O | H | L | P | E | T | G | T | T | D | Q | L | R | Q | S | L | N | T | I | S | Q | E | W | F | R | V | S | S | R | K | S | S | S | P | A | V | V | A | S | Y |   |   |
| hKANK4     | 742  | A | E | R | Y | K | P | S | E | E | F | L | N | A | C | R | A | L | S | O | H | L | P | E | T | G | T | T | D | Q | L | R | Q | S | L | N | T | I | S | Q | E | W | F | R | V | S | S | R | K | S | S | S | P | A | V | V | A | S | Y |   |   |
| mKANK3     | 526  | E | G | R | C | E | L | N | P | R | L | R | E | A | C | I | A | L | N | Q | Q | L | N | R | P | R | G | V | T | S | R | D | G | N | A | A | R | . | L | V | A | Q | E | W | F | R | V | S | S | Q | K | R | S | Q | A | E | S | V | A | G | V |
| hKANK3     | 543  | Q | G | R | C | E | L | S | P | R | L | R | E | A | C | V | A | L | Q | R | Q | L | S | R | P | R | G | V | A | S | . | D | G | G | A | V | R | . | L | V | A | Q | E | W | F | R | V | S | S | Q | R | R | S | Q | A | E | P | V | A | R | M |

|            |      |   |   |   |   |   |   |   |   |   |   |   |   |   |   |   |   |   |   |   |   |   |   |   |   |   |   |   |   |   |   |   |   |   |   |   |   |   |   |   |   |   |   |   |   |   |   |   |   |   |   |   |   |   |   |   |   |   |   |   |   |
|------------|------|---|---|---|---|---|---|---|---|---|---|---|---|---|---|---|---|---|---|---|---|---|---|---|---|---|---|---|---|---|---|---|---|---|---|---|---|---|---|---|---|---|---|---|---|---|---|---|---|---|---|---|---|---|---|---|---|---|---|---|---|
| mKANK1     | 1148 | I | A | A | F | E | A | I | S | P | D | V | L | R | Y | I | I | N | M | A | D | G | N | G | N | T | A | L | H | Y | S | V | S | H | S | N | F | Q | I | V | K | L | L | D | A | D | V | C | N | V | D | H | Q | N | K | A | G | Y | T | P |   |
| hKANK1     | 1140 | I | A | A | F | E | A | I | S | P | D | V | L | R | Y | V | I | N | L | A | D | G | N | G | N | T | A | L | H | Y | S | V | S | H | S | N | F | E | I | V | K | L | L | D | A | D | V | C | N | V | D | H | Q | N | K | A | G | Y | T | P |   |
| hKANK2iso1 | 645  | L | V | T | F | R | A | M | S | A | R | L | L | D | Y | V | V | N | I | A | D | S | N | G | N | T | A | L | H | Y | S | V | S | H | A | N | F | P | V | V | Q | L | L | D | S | G | V | C | K | V | D | K | O | N | R | A | G | Y | S | P |   |
| hKANK2iso2 | 653  | L | V | T | F | R | A | M | S | A | R | L | L | D | Y | V | V | N | I | A | D | S | N | G | N | T | A | L | H | Y | S | V | S | H | A | N | F | P | V | V | Q | L | L | D | S | G | V | C | K | V | D | K | O | N | R | A | G | Y | S | P |   |
| mKANK2     | 637  | L | V | T | F | R | A | M | S | A | R | L | L | D | Y | V | V | N | I | A | D | S | N | G | N | T | A | L | H | Y | S | V | S | H | A | N | F | P | V | V | R | O | L | L | D | S | G | V | C | H | V | D | K | L | N | R | A | G | Y | S | P |
| mKANK4     | 817  | L | L | E | V | Q | P | H | S | P | H | L | K | L | L | V | N | L | A | D | R | S | G | N | T | A | L | H | Y | S | V | S | H | S | N | F | A | I | V | K | L | L | D | T | G | V | C | N | V | D | H | Q | N | K | A | G | Y | T | A |   |   |
| hKANK4     | 802  | L | H | E | V | Q | P | H | S | P | H | L | K | L | L | V | N | L | A | D | R | S | G | N | T | A | L | H | Y | S | V | S | H | S | N | F | S | I | V | K | L | L | E | T | G | V | C | N | V | D | H | Q | N | K | A | G | Y | T | A |   |   |
| mKANK3     | 585  | L | R | G | V | K | S | L | G | P | E | L | L | A | Y | V | V | N | L | A | D | G | N | G | N | T | A | L | H | Y | S | V | S | H | G | N | L | A | I | S | S | L | L | D | T | G | V | C | N | V | D | H | Q | N | R | A | G | Y | S | A |   |
| hKANK3     | 601  | L | E | G | V | R | R | L | G | P | E | L | L | A | H | V | V | N | L | A | D | G | N | G | N | T | A | L | H | Y | S | V | S | H | G | N | L | A | I | A | S | L | L | D | T | G | A | C | E | V | N | R | O | N | R | A | G | Y | S | A |   |

|            |      |   |   |   |   |   |   |   |   |   |   |   |   |   |   |   |   |   |   |   |   |   |   |   |   |   |   |   |   |   |   |   |   |   |   |   |   |   |   |   |   |   |   |   |   |   |   |   |   |   |   |   |   |   |   |   |   |   |   |   |   |
|------------|------|---|---|---|---|---|---|---|---|---|---|---|---|---|---|---|---|---|---|---|---|---|---|---|---|---|---|---|---|---|---|---|---|---|---|---|---|---|---|---|---|---|---|---|---|---|---|---|---|---|---|---|---|---|---|---|---|---|---|---|---|
| mKANK1     | 1208 | I | M | L | A | A | L | A | V | E | A | . | E | K | D | M | Q | V | E | E | L | F | S | C | G | D | V | N | A | K | A | S | Q | A | G | O | T | A | L | M | L | A | V | S | H | G | R | I | D | M | V | K | G | L | L | A | C | G | A |   |   |
| hKANK1     | 1200 | I | M | L | A | A | L | A | V | E | A | . | E | K | D | M | R | I | V | E | E | L | F | G | C | D | V | N | A | K | A | S | Q | A | G | O | T | A | L | M | L | A | V | S | H | G | R | I | D | M | V | K | G | L | L | A | C | G | A |   |   |
| hKANK2iso1 | 705  | I | M | L | T | A | L | A | T | L | K | T | . | Q | D | D | I | E | T | V | L | Q | L | F | R | L | G | N | I | N | A | K | A | S | Q | A | G | O | T | A | L | M | L | A | V | S | H | G | R | V | D | V | K | A | L | L | A | C | E | A |   |
| hKANK2iso2 | 713  | I | M | L | T | A | L | A | T | L | K | T | . | Q | D | D | I | E | T | V | L | Q | L | F | R | L | G | N | I | N | A | K | A | S | Q | A | G | O | T | A | L | M | L | A | V | S | H | G | R | V | D | V | K | A | L | L | A | C | E | A |   |
| mKANK2     | 697  | I | M | L | T | A | L | A | T | L | K | T | . | Q | D | D | I | E | T | I | L | Q | L | F | R | L | G | N | V | N | A | K | A | S | Q | A | G | O | T | A | L | M | L | A | V | S | H | G | R | V | D | V | R | A | L | L | A | C | E | A |   |
| mKANK4     | 877  | V | M | I | T | P | L | A | S | A | E | T | . | K | E | D | M | A | V | V | W | K | L | L | R | E | G | N | V | N | I | O | A | T | O | G | G | O | T | A | L | M | L | G | V | S | H | D | R | E | D | M | V | Q | A | L | L | S | C | O | A |
| hKANK4     | 862  | V | M | I | T | P | L | A | S | A | E | T | . | N | E | D | M | A | V | V | W | K | L | L | R | E | G | N | V | N | I | O | A | T | O | G | G | O | T | A | L | M | L | G | V | S | H | D | R | E | D | M | V | Q | A | L | L | S | C | O | A |
| mKANK3     | 645  | L | M | L | A | A | L | T | S | V | G | O | E | E | D | M | A | V | A | Q | R | L | F | S | M | G | D | V | N | A | K | A | S | Q | T | G | O | T | A | L | M | L | A | I | S | H | G | Q | D | M | V | A | L | L | E | C | G | A |   |   |   |
| hKANK3     | 661  | L | M | L | A | A | L | T | S | V | R | O | E | E | D | M | A | V | A | Q | R | L | F | C | M | G | D | V | N | A | K | A | S | Q | T | G | O | T | A | L | M | L | A | I | S | H | G | Q | D | M | V | A | T | L | L | A | C | G | A |   |   |

|            |      |   |   |   |   |   |   |   |   |   |   |   |   |   |   |   |   |   |   |   |   |   |   |   |   |   |   |   |   |   |   |   |   |   |   |   |   |   |   |   |   |   |   |   |   |   |   |   |   |   |   |   |   |   |   |   |   |   |   |   |   |
|------------|------|---|---|---|---|---|---|---|---|---|---|---|---|---|---|---|---|---|---|---|---|---|---|---|---|---|---|---|---|---|---|---|---|---|---|---|---|---|---|---|---|---|---|---|---|---|---|---|---|---|---|---|---|---|---|---|---|---|---|---|---|
| mKANK1     | 1267 | D | V | N | I | Q | D | D | E | G | S | T | A | L | M | C | A | S | E | H | G | H | V | E | I | V | K | L | L | L | A | O | P | G | C | N | G | H | L | E | D | N | D | G | S | T | A | L | S | I | A | L | E | A | G | . | H | K | D | I | A |
| hKANK1     | 1259 | D | V | N | I | Q | D | D | E | G | S | T | A | L | M | C | A | S | E | H | G | H | V | E | I | V | K | L | L | L | A | O | P | G | C | N | G | H | L | E | D | N | D | G | S | T | A | L | S | I | A | L | E | A | G | . | H | K | D | I | A |
| hKANK2iso1 | 764  | D | V | N | V | Q | D | D | E | G | S | T | A | L | M | C | A | S | E | H | G | H | K | E | I | A | G | L | L | L | A | V | P | S | C | D | I | S | L | T | D | R | D | G | S | T | A | L | M | V | A | L | D | A | G | . | Q | S | E | I | A |
| hKANK2iso2 | 772  | D | V | N | V | Q | D | D | E | G | S | T | A | L | M | C | A | S | E | H | G | H | K | E | I | A | G | L | L | L | A | V | P | S | C | D | I | S | L | T | D | R | D | G | S | T | A | L | M | V | A | L | D | A | G | . | Q | S | E | I | A |
| mKANK2     | 756  | D | V | N | I | Q | D | D | E | G | S | T | A | L | M | C | A | S | E | H | G | H | K | E | I | T | G | L | L | L | A | V | P | S | C | D | I | S | L | T | D | R | D | G | S | T | A | L | M | V | A | L | D | A | G | . | Q | S | E | I | A |
| mKANK4     | 936  | D | V | N | L | Q | D | H | D | G | S | S | A | L | M | L | A | C | H | H | C | N | V | D | L | R | L | L | L | A | H | F | A | C | D | S | S | L | T | D | K | A | G | R | T | A | L | S | I | A | L | K | S | P | T | H | M | E | I | A |   |
| hKANK4     | 921  | D | V | N | L | Q | D | H | D | G | S | S | A | L | M | V | A | C | H | H | C | N | V | D | L | R | L | L | L | A | H | F | A | C | D | S | S | L | T | D | K | A | G | R | T | A | L | S | I | A | L | K | S | P | T | H | M | E | I | A |   |
| mKANK3     | 705  | D | V | N | V | Q | D | A | D | G | A | T | A | L | M | C | A | S | E | Y | G | R | L | D | T | V | Q | L | L | L | A | O | P | G | C | D | I | T | I | L | D | N | E | G | T | S | A | L | I | A | L | E | A | E | . | Q | D | E | V | A |   |
| hKANK3     | 721  | D | V | N | A | Q | D | A | D | G | A | T | A | L | M | C | A | S | E | Y | G | R | L | D | T | V | R | L | L | L | A | O | P | G | C | D | P | A | I | L | D | N | E | G | T | S | A | L | I | A | L | E | A | E | . | Q | D | E | V | A |   |

|            |      |   |   |   |   |   |   |   |   |   |   |   |   |   |
|------------|------|---|---|---|---|---|---|---|---|---|---|---|---|---|
| mKANK1     | 1326 | V | L | L | Y | A | H | L | N | F | S | K | A | Q |
| hKANK1     | 1318 | V | L | L | Y | A | H | V | N | F | A | K | A | Q |
| hKANK2iso1 | 823  | S | M | L | Y | S | R | M | N | I | K | C | S | F |
| hKANK2iso2 | 831  | S | M | L | Y | S | R | M | N | I | K | C | S | F |
| mKANK2     | 815  | S | M | L |   |   |   |   |   |   |   |   |   |   |

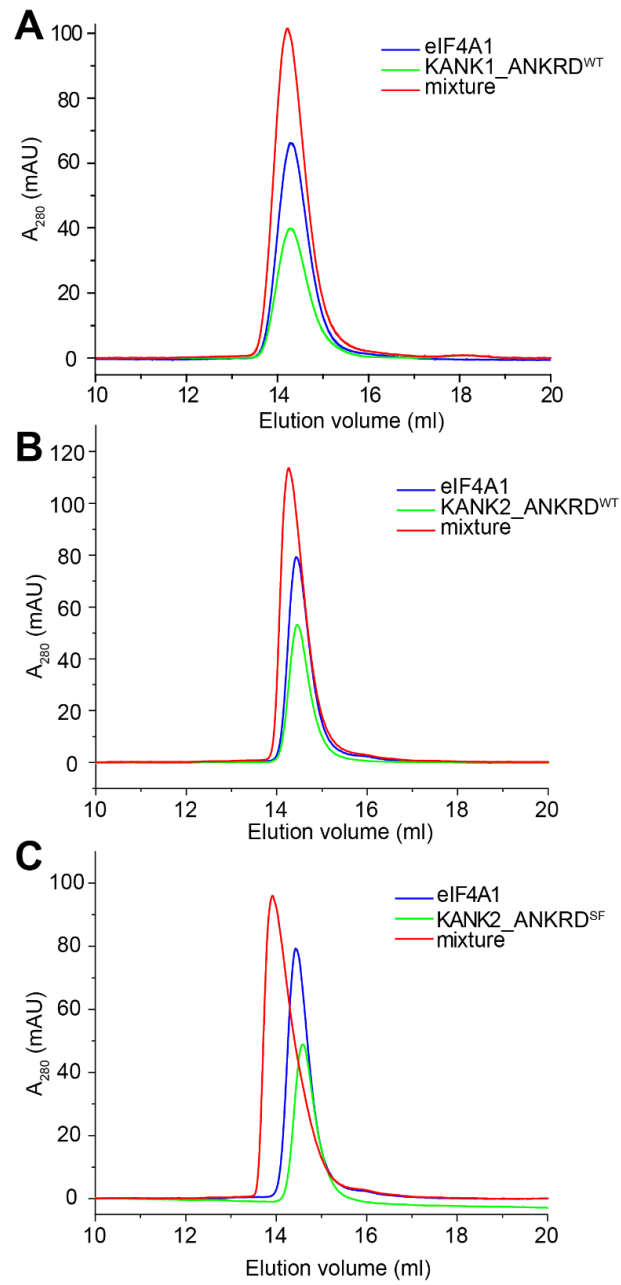

Supplementary Figure 2

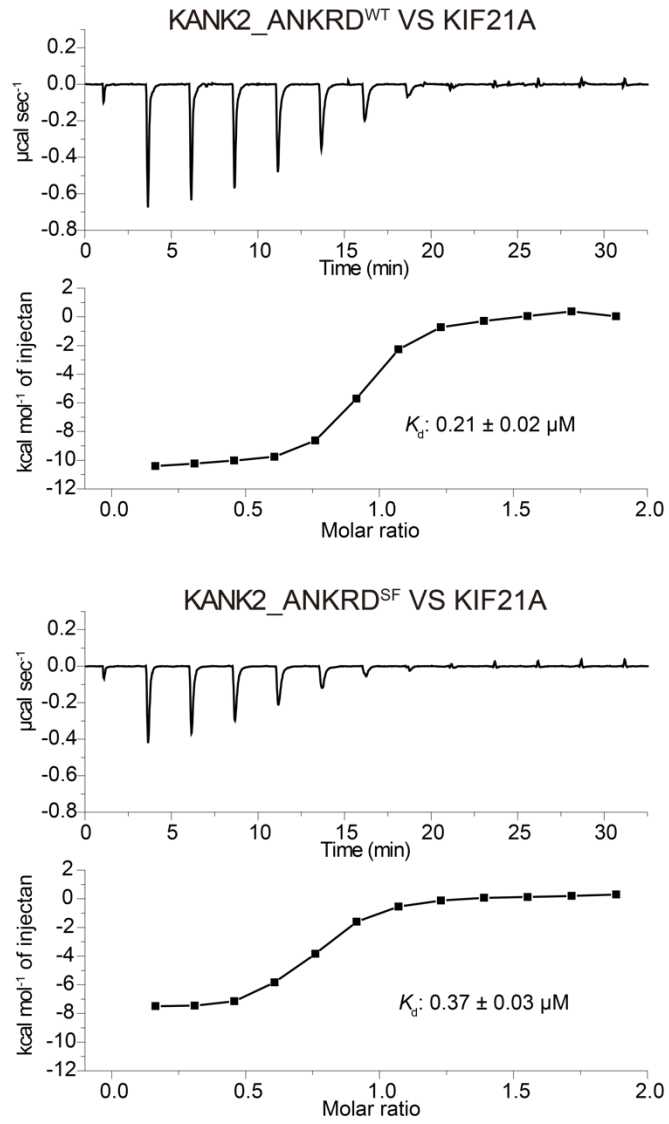

**Supplementary Figure 3**

KANK1\_ANKRD<sup>SF</sup>-eIF4A1  
KANK1\_ANKRD<sup>WT</sup> (PDB code 5YAZ)

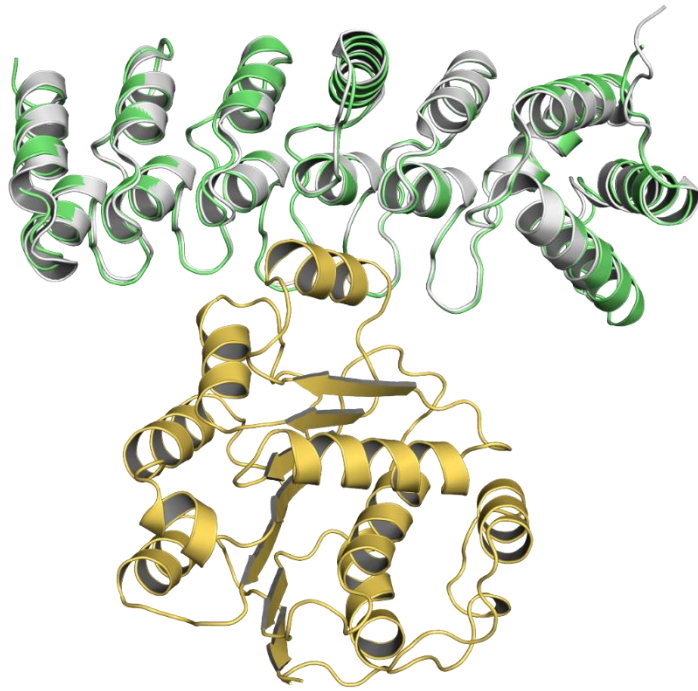

**Supplementary Figure 4**

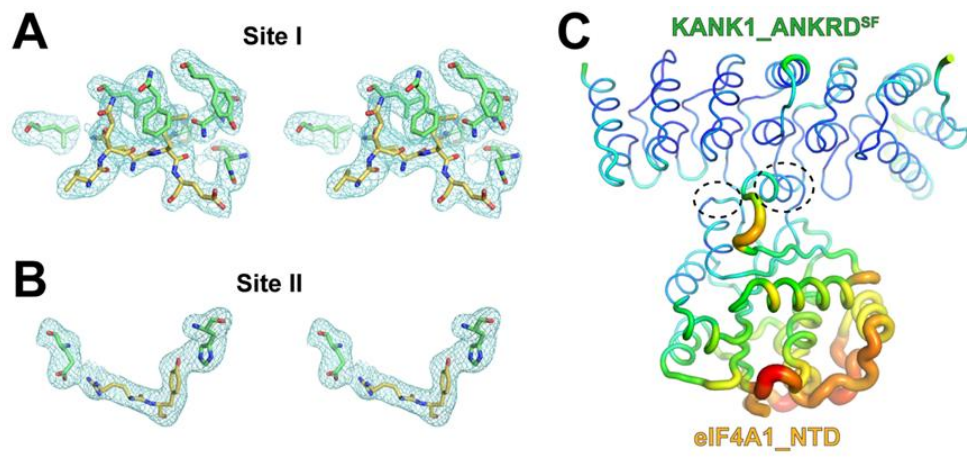

Supplementary Figure 5

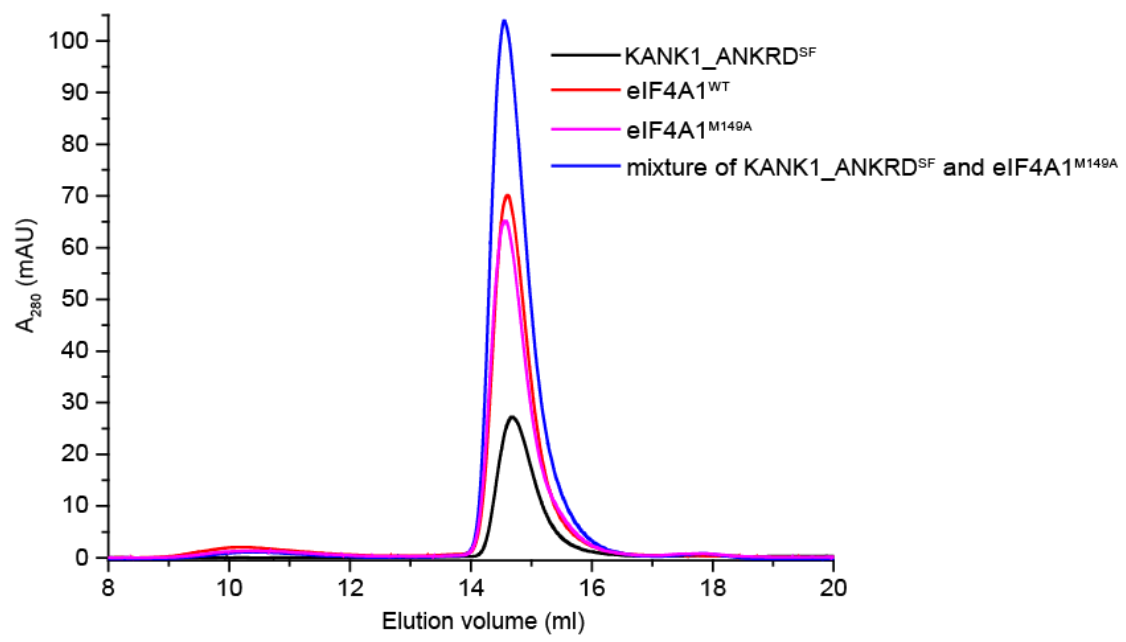

**Supplementary Figure 6**



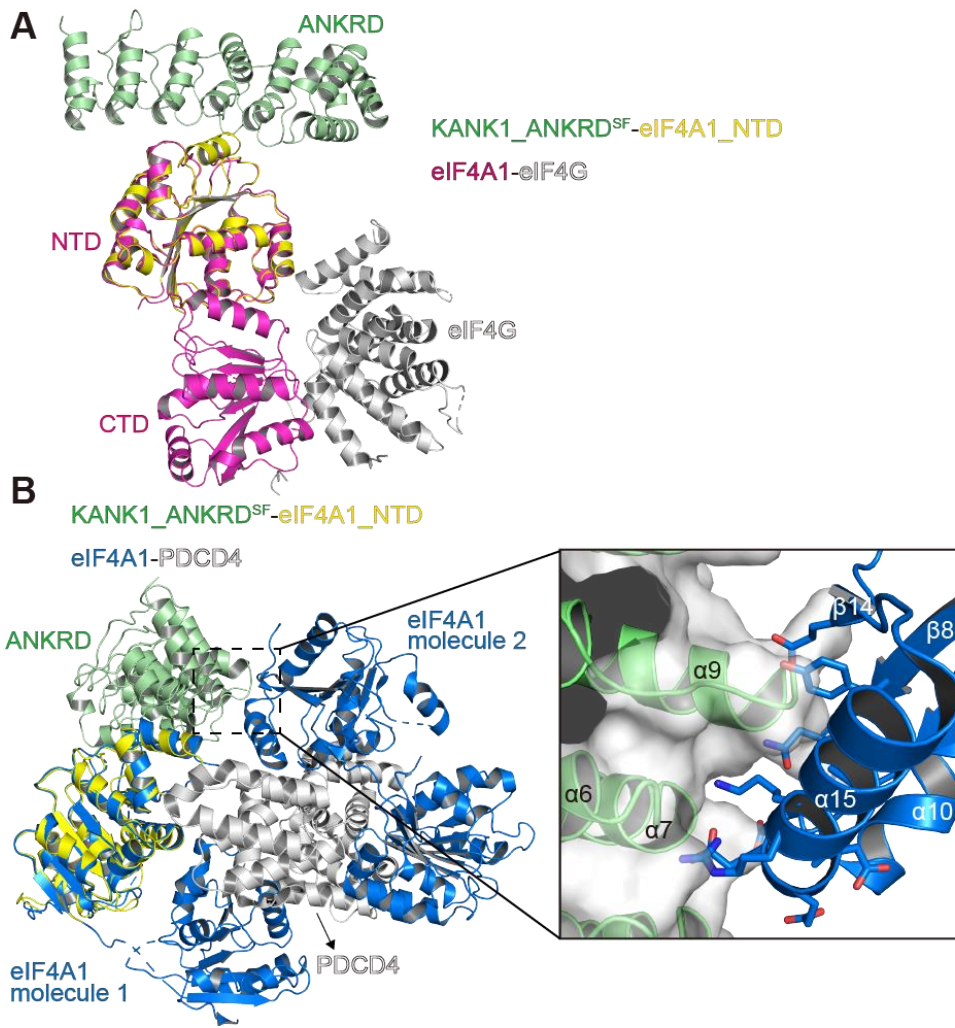

Supplementary Figure 7

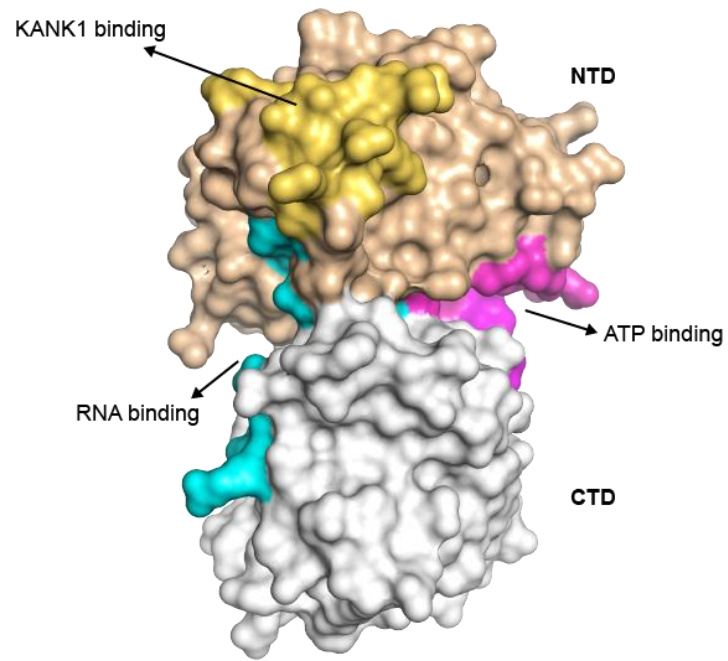

**Supplementary Figure 8**



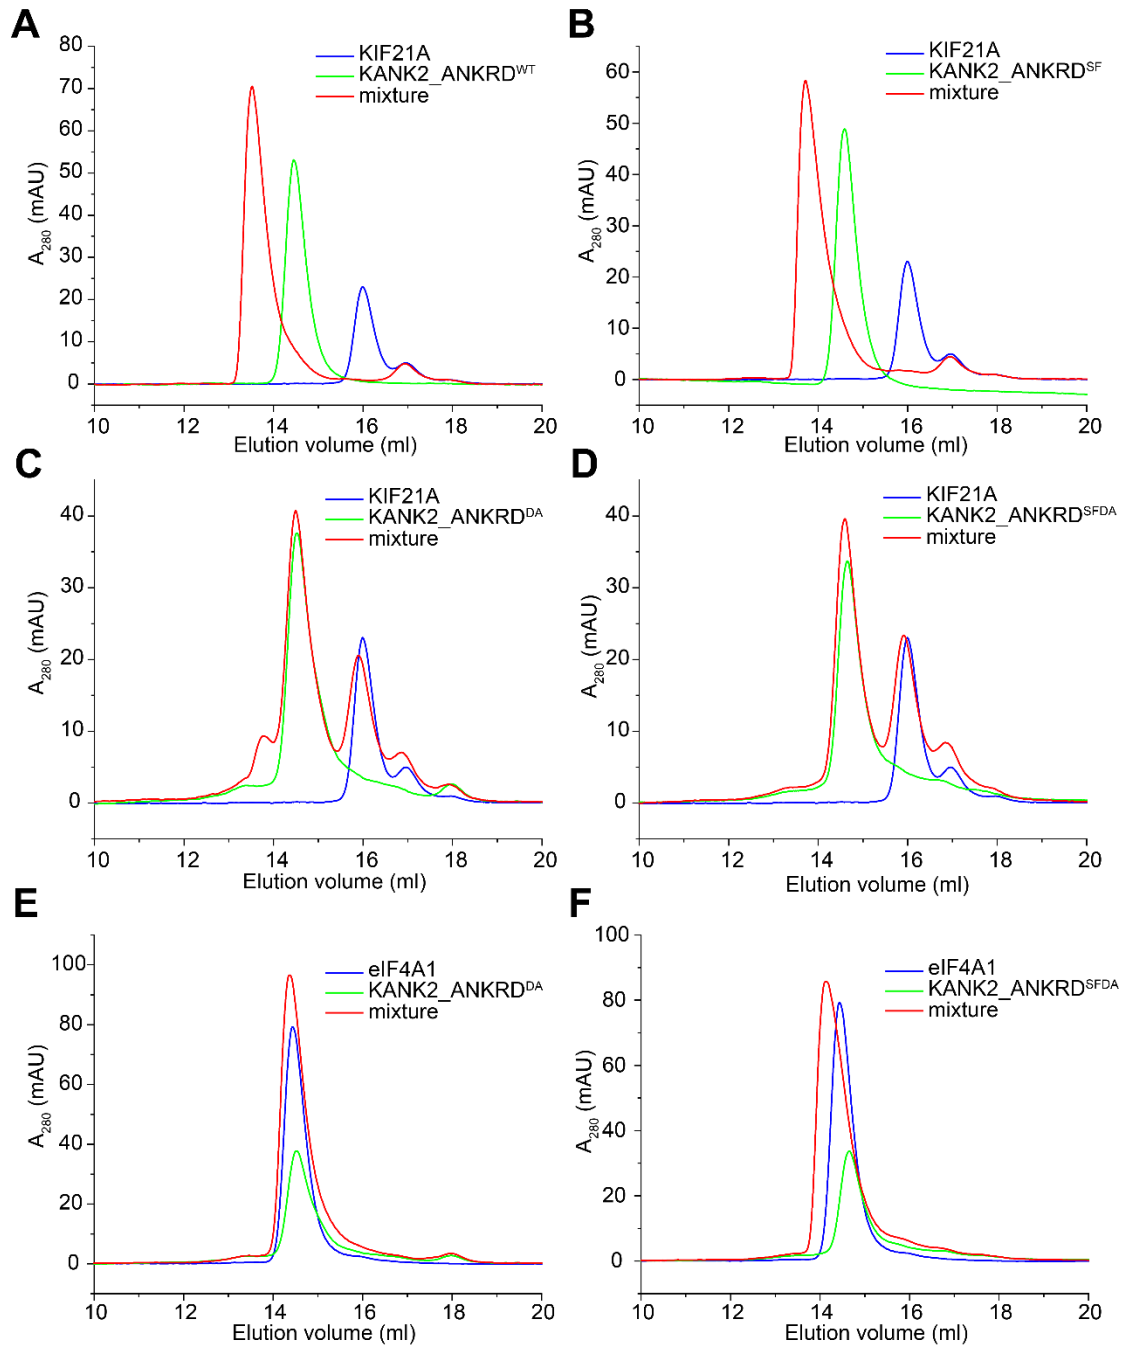

**Supplementary Figure 10**

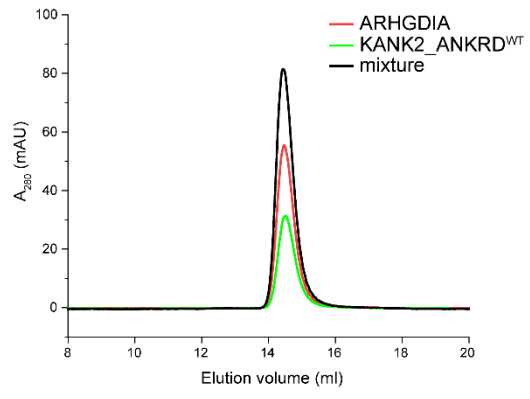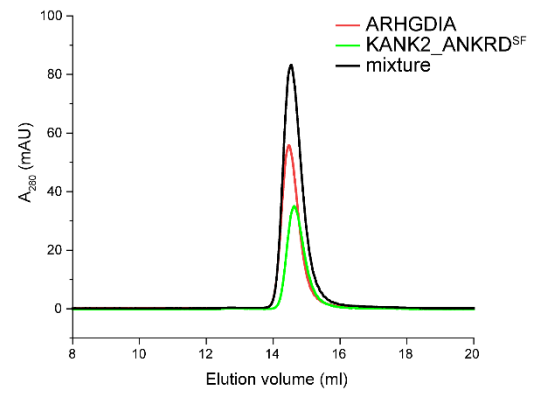

**Supplementary Figure 11**
